# Supplementary material
Source: PubMed Central journal article supplement (PMC3250144)
Supplement: 1110972108_pnas.201110972SI.pdf [file 1110972108_pnas.201110972SI.pdf]

# Supporting Information

Vieira-Silva et al. 10.1073/pnas.1110972108

## SI Materials and Methods

**Ortholog Alignments.** The 61 families of orthologs in the 74 proteobacteria were aligned with MUSCLE (1). Poorly aligned regions were removed using Gblocks with nonstringent parameters, allowing a maximum of 10 nonconserved contiguous positions and a minimum block size of 8 and allowing for gaps in half the sequences (2).

**Deep-Phylogenetic Analyses.** We used the HOGENOM4 database (3) to identify homolog families present in at least six organisms of at least 10 of the following 15 clades:  $\alpha$ -proteobacteria ( $\alpha$ P,  $n = 47$ ),  $\beta$ -proteobacteria ( $\beta$ P,  $n = 32$ ),  $\delta$ -proteobacteria ( $\delta$ P,  $n = 12$ ),  $\epsilon$ -proteobacteria ( $\epsilon$ P,  $n = 7$ ),  $\gamma$ -proteobacteria ( $\gamma$ P,  $n = 63$ ), actinobacteria (Ac,  $n = 28$ ), bacillales/lactobacillales (Ba,  $n = 34$ ), bacteroidetes/chlorobi (Bt,  $n = 9$ ), chlamydiae/verrucomicrobia (Ch,  $n = 7$ ), clostridia (Cl,  $n = 7$ ), cyanobacteria (Cy,  $n = 13$ ), spirochaetes (Sp,  $n = 7$ ), tenericutes (Te,  $n = 14$ ), crenarchaeota ( $n = 11$ ), euryarchaeota ( $n = 25$ ).

All deep-phylogenetic trees were reconstructed with RAXML (model WAG+8 $\Gamma$ +I, 100 rapid bootstraps) (4). To assess the topological differences between deep-phylogenies reconstructed using lowly (LEP) or highly expressed proteins (HEP), we counted the number of nodes from the clade's most recent common ancestor to the root using *ade4* in R (5, 6). We inferred the minimal generation time of each clade's ancestor using generalized least squares (GLS) with the Brownian motion model (R package *ape*) (7).

**Expressivity Indices.** We used several expressivity indices based on experimental data (mRNA and protein concentrations), or predictions (codon usage bias) for *Escherichia coli*. The Codon Adaptation Index (CAI) measures the fit between the codon usage of a gene and that of a reference set of highly expressed genes (8). For the latter we used the genes encoding the ribosomal proteins. The mRNA index is a weighted average of three experimental transcriptomics datasets for *E. coli*, normalized to the same average expression among common genes. The corrective factors were: 1.10 (9), 1.05 (10), 2.45 (11). Similarly, the Protein index is a weighted average of two experimental proteomics datasets with corrective factors 0.702 (12) and 1.989 (11, 13). Even though not all *E. coli* genes were analyzed in all proteomics or transcriptomics analysis, all of the 61 orthologs common to the 74 proteobacteria have a corresponding mRNA index, and 60 have a corresponding Protein index. Because the mRNA index is more complete, based on more experiments and independent of sequence composition (contrary to CAI) we used it throughout the work.

**Evolutionary Rate Difference.** For each pair of protein trees ( $p_1$ ,  $p_2$ ), for each taxon (sp), we compute the normalized difference of the terminal branches lengths ( $r_i$ ) as  $(r_{p1} - r_{p2}) / (r_{p1} + r_{p2})$ . We then computed the correlation between evolutionary rate variation and minimum generation times. For each pair of

protein trees, we then computed the nonparametric Spearman correlation [ $\rho_{(p1,p2)}$ ] between the evolutionary rate variation and the minimum generation time attributed to the taxon. The distribution of the coefficients of correlation of the set of pairs of proteins with very different expression levels was then used to test our hypothesis.

We also controlled this analysis for multiple comparisons and phylogenetic nonindependence of the data. To use exclusively independent pairwise comparisons, we sampled 1,000 times, without replacement, the set of 61 ortholog families for the pairs of proteins with significantly different expression levels. We thus obtained 1,000 sets of pairs of protein trees with a fivefold difference in expressivity and where one protein tree is represented at most once in each set. Then we tested for phylogenetic independent contrasts in each set of pairs of proteins. For each pair of protein trees we computed the phylogenetic independent contrasts (14) for the minimum generation times and for the evolutionary rate variation between proteins with *ape* (7), using the reference tree for the 74 proteobacteria. Finally, we calculated the median of the values of Spearman correlations for each set. The significance of the negative relation between evolutionary rate heterogeneity and minimum generation time is estimated as the number of sets with negative medians (e.g., if all medians are negative as proposed by  $H_1$ , then the control (PD- $P$  value < 0.001). In short, PD- $P$  value refers to the  $P$  value of the test on the median of the distribution of Spearman correlations using phylogenetically independent contrasts and controlling for multiple comparisons.

**Estimation of Effective Population Size.** We estimated the effective population size scaled by mutation rate ( $Ne.u$ ) of 38 species with published minimum generation time by using published data on their genetic diversity (15).

Given the average number of substitutions between silent sites in two randomly sampled allelic sequences ( $H$ ),  $Ne.u$  was computed:  $Ne.u = 3H / (3 - 4H)$  (16).

Assuming similar mutation and recombination rates, the composite parameter  $Ne.u$  will correlate to the degree of influence of genetic drift in evolutionary process in different lineages. It is thought that mutation rate is largely determined by genome size (17), and we have previously shown that there is no significant association between minimal generation times and genome size (18).

**Skewness.** The skewness of the distribution ( $\gamma_1$ ) is estimated as follows. A positive coefficient ( $\gamma_1 > 0$ ) indicates a distribution skewed to the left, with the bulk of values falling to the left of the mean. A Gaussian distribution has a null coefficient ( $\gamma_1 = 0$ ).

$$\gamma_1 = \frac{n}{(n-1)(n-2)} \sum_{i=1}^n \left( \frac{x_i - \bar{x}}{sd(x)} \right)^3; \text{ with } sd(x) = \sqrt{\frac{1}{n-1} \sum_{i=1}^n (x_i - \bar{x})^2}$$

1. Edgar RC (2004) MUSCLE: Multiple sequence alignment with high accuracy and high throughput. *Nucleic Acids Res* 32:1792–1797.
2. Talavera G, Castresana J (2007) Improvement of phylogenies after removing divergent and ambiguously aligned blocks from protein sequence alignments. *Syst Biol* 56:564–577.
3. Penel S, et al. (2009) Databases of homologous gene families for comparative genomics. *BMC Bioinformatics* 10(Suppl 6):S3.
4. Stamatakis A (2006) RAXML-VI-HPC: Maximum likelihood-based phylogenetic analyses with thousands of taxa and mixed models. *Bioinformatics* 22:2688–2690.

5. Chessel D, Dufour AB, Thioulouse J (2004) The *ade4* package I: One-table methods. *R news* 4(1):5–10.
6. R Development Core Team (2009) R: A language and environment for statistical computing. (R Foundation for Statistical Computing, Vienna, Austria) <http://www.R-project.org>. Accessed September, 2009.
7. Paradis E, Claude J, Strimmer K (2004) APE: Analyses of Phylogenetics and Evolution in R language. *Bioinformatics* 20:289–290.
8. Sharp PM, Li WH (1987) The codon Adaptation Index—A measure of directional synonymous codon usage bias, and its potential applications. *Nucleic Acids Res* 15:1281–1295.

9. Allen TE, et al. (2003) Genome-scale analysis of the uses of the *Escherichia coli* genome: Model-driven analysis of heterogeneous data sets. *J Bacteriol* 185: 6392–6399.
10. Corbin RW, et al. (2003) Toward a protein profile of *Escherichia coli*: Comparison to its transcription profile. *Proc Natl Acad Sci USA* 100:9232–9237.
11. Masuda T, Saito N, Tomita M, Ishihama Y (2009) Unbiased quantitation of *Escherichia coli* membrane proteome using phase transfer surfactants. *Mol Cell Proteomics* 8: 2770–2777.
12. Lopez-Campistrous A, et al. (2005) Localization, annotation, and comparison of the *Escherichia coli* K-12 proteome under two states of growth. *Mol Cell Proteomics* 4: 1205–1209.
13. Ishihama Y, et al. (2008) Protein abundance profiling of the *Escherichia coli* cytosol. *BMC Genomics* 9:102.
14. Felsenstein J (1985) Phylogenies and the comparative method. *Am Nat* 125:1.
15. Lynch M (2006) The origins of eukaryotic gene structure. *Mol Biol Evol* 23:450–468.
16. Lynch M, Conery JS (2003) The origins of genome complexity. *Science* 302:1401–1404.
17. Drake JW (1991) A constant rate of spontaneous mutation in DNA-based microbes. *Proc Natl Acad Sci USA* 88:7160–7164.
18. Vieira-Silva S, Touchon M, Rocha EP (2010) No evidence for elemental-based streamlining of prokaryotic genomes. *Trends Ecol Evol* 25:319–320, author reply 320–321.

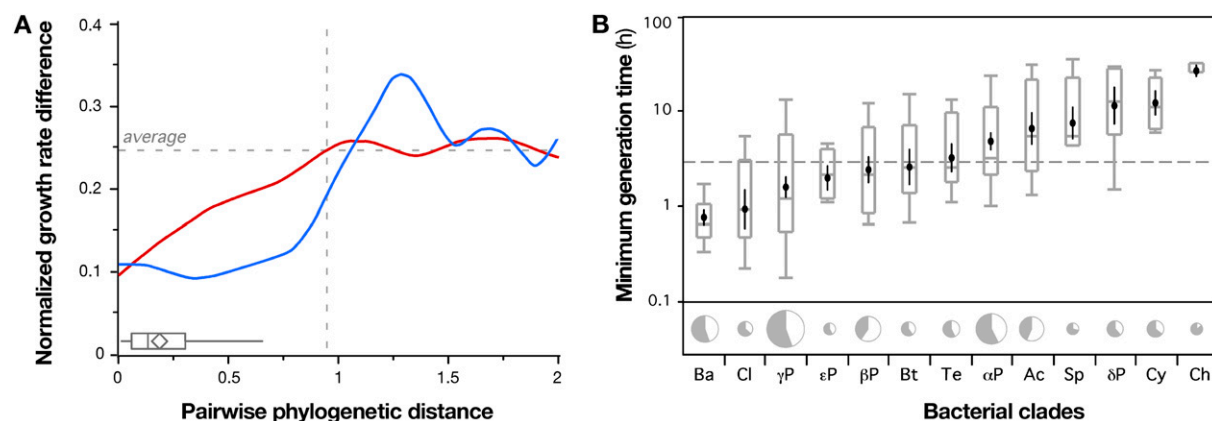

**Fig. S1.** Minimum generation times in bacteria and archaea. (A) Phylogenetic inertia associated to minimum generation time in 154 bacteria and archaea. We computed the pairwise differences in the log-transformed minimum generation times (average: horizontal dashed line). Pairwise phylogenetic distances were computed from the reference phylogeny. A flexible spline was fitted to pairwise comparisons between proteobacteria (red) and between all other taxa except proteobacteria (blue). The latter exhibit higher phylogenetic inertia (i.e., closely related taxa tend to have more similar growth rates). The boxplot on the *Lower Left* represents the distribution of terminal branch lengths in the reference tree of our dataset of 74 proteobacteria, where whiskers span from the minimum to the maximum. These are all below the threshold of significant phylogenetic inertia, represented by the dashed vertical line ( $\alpha = 0.95$  substitutions per site). In branches larger than this length in proteobacteria, the probability of an extant fast (slow) grower to remain fast (slow)-grower is the same as of having changed. (B) Distribution of characterized minimum generation times in bacterial clades. The surface of the pie-charts is proportional to the number of representatives from each clade in the reference tree, with the gray portion corresponding to those with characterized minimum generation times in the primary literature (1). The distribution of the generation times within each clade is represented by a gray boxplot, where the central line of the box is the median, the edges of the box are the quartiles, and the whiskers extend from the ends of the box to the outermost datapoint that falls within the distances computed: quartiles  $\pm 1.5 \times$  interquartile range. The average and SD of the distribution are represented by a black dot and line. The dashed line is the overall average of characterized minimum generation times.

1. Vieira-Silva S, Rocha EPC (2010) The systemic imprint of growth and its uses in ecological (meta)genomics. *PLoS Genet* 6:e1000808.

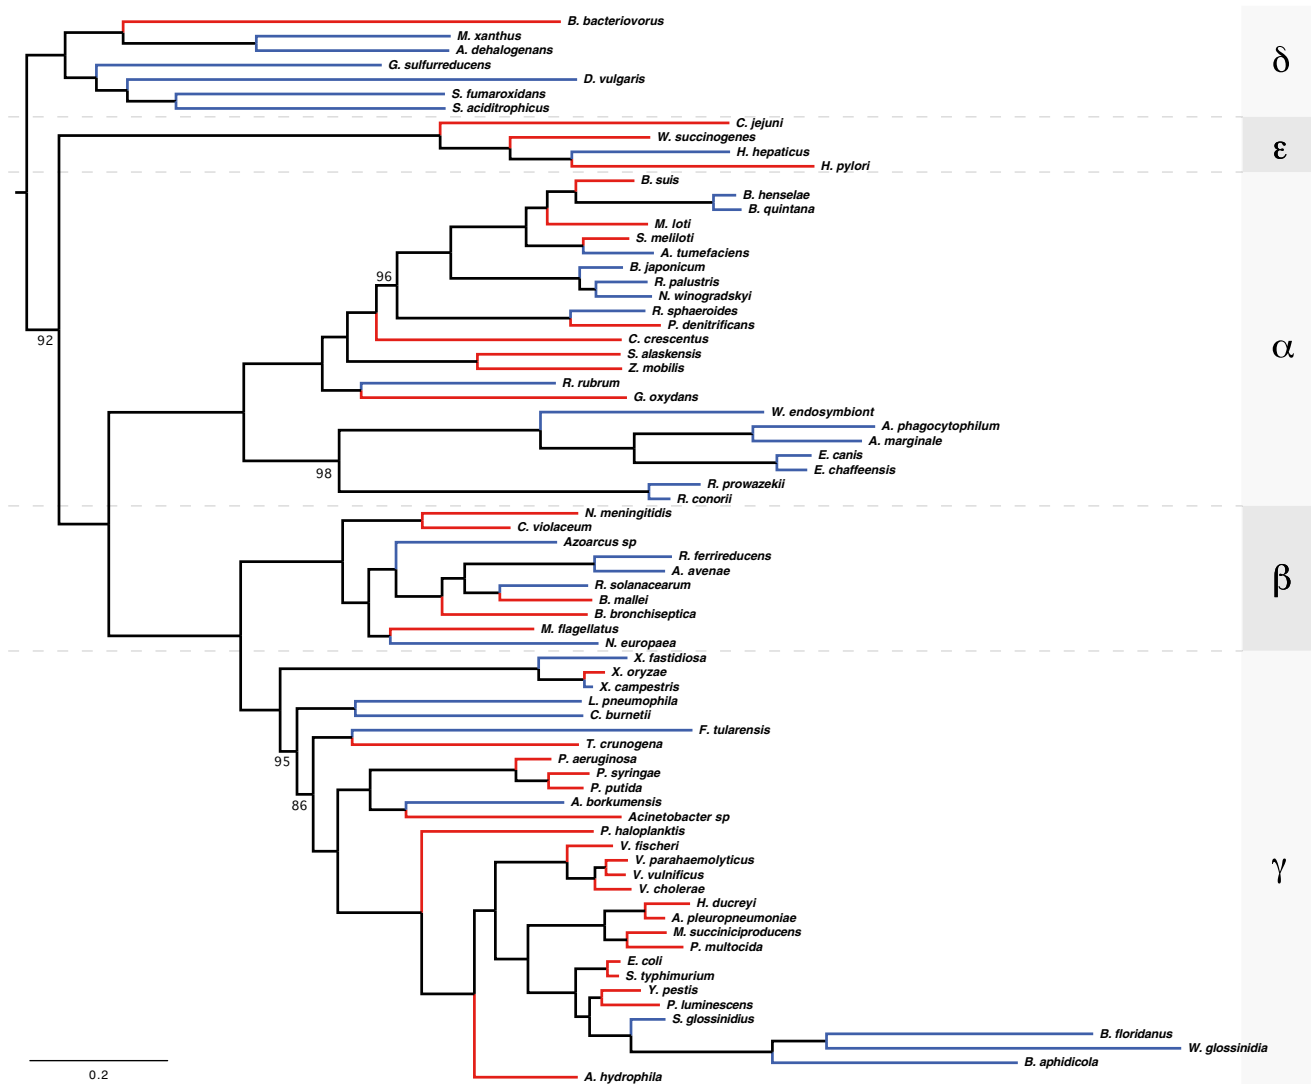

**Fig. S2.** Reference tree of the 74 proteobacteria with published minimum generation times. Branch supports lower than 99% are reported on the figure, as estimated by rapid bootstrap (4). Branch lengths represent protein evolutionary rates (scale: 0.2 substitutions per site). Red and blue branches correspond to the fast and slow ( $g > 2.5$  h) growers. Classes within proteobacteria are identified by the corresponding greek letter.

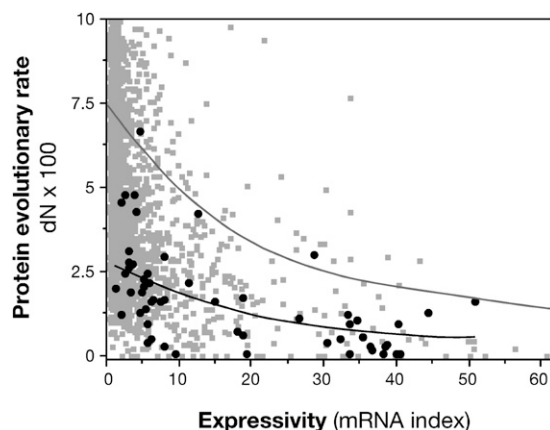

**Fig. S3.** Protein evolutionary rate variation according to expressivity in *E. coli*. Evolutionary rates for orthologs of *E. coli* and *Salmonella enterica* were retrieved from a previous publication (1). The black datapoints correspond to the subset of *E. coli* orthologs included in the 61 ortholog families shared by the 74 proteobacteria. A smoothing spline was fitted for the whole dataset ( $\rho = -0.47$ ;  $P < 10^{-4}$ ;  $n = 2,060$ ) and for the 61 ortholog families ( $\rho = -0.68$ ;  $P < 10^{-4}$ ;  $n = 61$ ). The figure was truncated for values of substitution rates higher than 10%.

1. Rocha EPC, Danchin A (2004) An analysis of determinants of amino acids substitution rates in bacterial proteins. *Mol Biol Evol* 21:108–116.

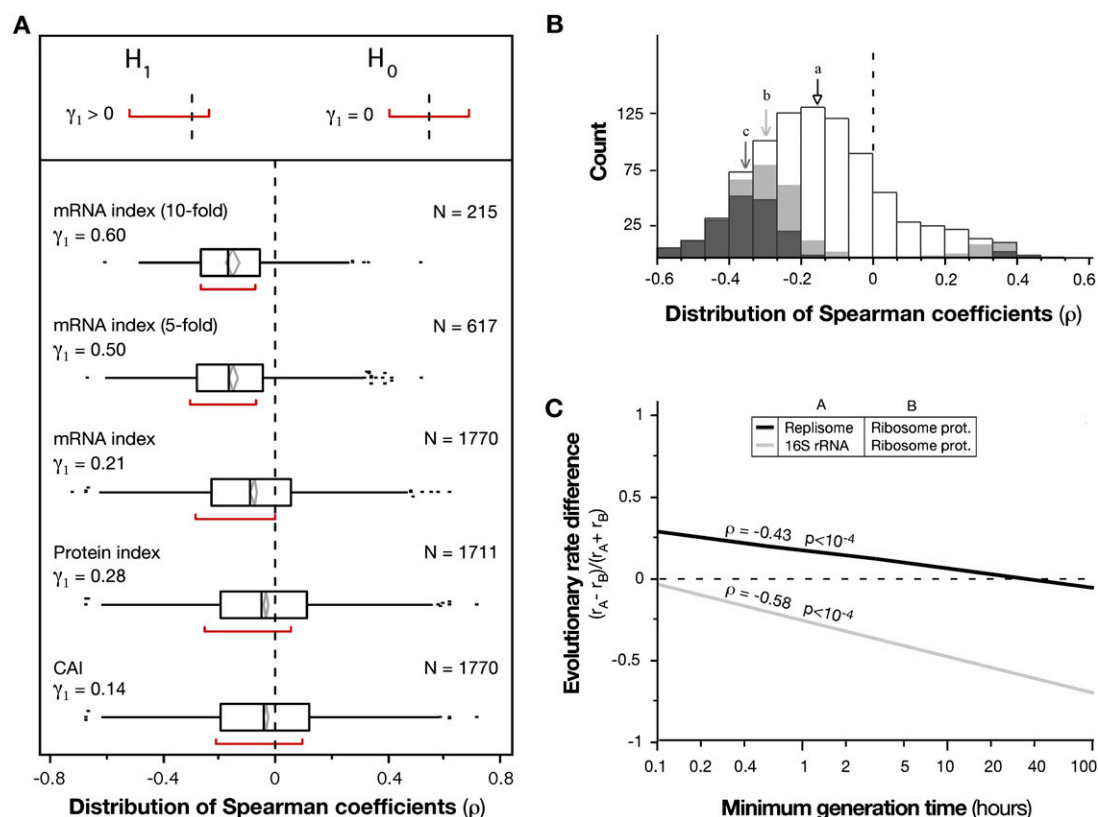

**Fig. S4.** Analysis of evolutionary rate differences on diverse datasets. (A) Distribution of Spearman coefficients of the association between the organism's generation time ( $g$ ) and evolutionary rate variation between HEP and LEP ( $\Delta$ ) using different expressivity indexes (*SI Materials and Methods*). For any pair of protein where the first has a lower expressivity than the second, we calculated the Spearman correlation between  $g$  and  $\Delta$ . We expect the distribution to be centered on zero under  $H_0$  (no correlation between growth and evolutionary rate variations) or skewed toward negative values under  $H_1$  (negative correlation between growth and evolutionary rate variations between LEP and HEP). The median and quartiles of the distributions are represented in boxplots. The average and 95% confidence interval are represented by a gray diamond. The red bracket identifies the most-dense 50% of the observations. All averages are significantly lower than zero ( $P < 10^{-4}$ ) and the positive skewness coefficients ( $\gamma_1$ ) indicate that the bulk of values lie to the left of the mean. (B) Distribution of Spearman coefficients of all pairwise comparisons between protein families with a fivefold difference in expressivity (mRNA index): (a) Median over the entire distribution ( $n = 617$ ); (b and c) Median of the pairs that show individually statistically significant correlations (respectively at  $P < 0.05$  and  $P < 0.01$ ). (C) Ribosomal proteins evolve slower than the replisome proteins and the 16S rDNA with decreasing generation times of 74 proteobacteria.

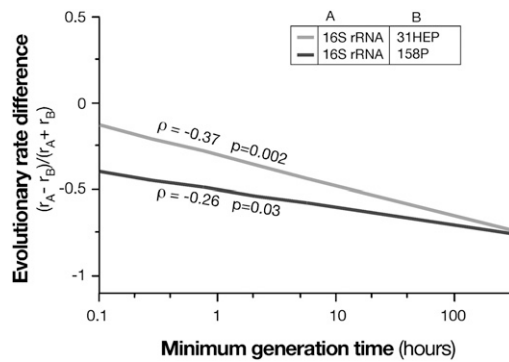

**Fig. S5.** Evolutionary rate variation in deep-phylogenies according to the minimum generation time. We compared the terminal branch lengths in deep phylogenies reconstructed with 31 HEP (1), 158 homolog families (158P), and 16S rRNA sequences for the set of species with congruent topology in all trees (72 bacteria and an outgroup of 10 archaea).

1. Ciccarelli FD, et al. (2006) Toward automatic reconstruction of a highly resolved tree of life. *Science* 311:1283–1287.

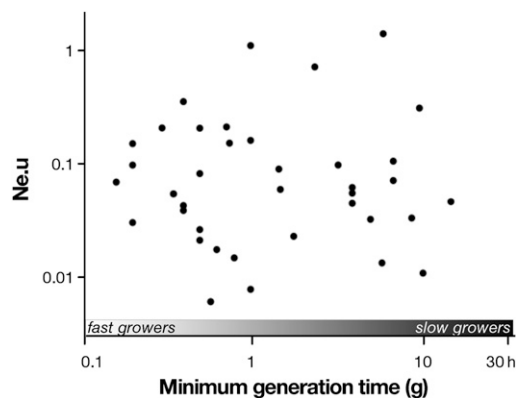

**Fig. S6.** Effective population size scaled by mutation rate ( $Ne.u$ ) according to the minimum generation time. We estimated  $Ne.u$  for 38 species with published minimum generation time using published genetic diversity data (15). No significant correlation was found between the two variables ( $\rho = -0.042$ ,  $P$  value = 0.80). From the original dataset in ref. 15, we excluded *Buchnera* (already controlled for when excluding endomutualists) and *Mycobacterium tuberculosis* (marked as an outlier in ref. 15). Inclusion of these two points does not change the conclusions ( $\rho = -0.18$ ,  $P$  value = 0.27).

**Table S1. Negative correlation between the expressivity of the 61 proteins in *E. coli* and their substitution rates between *Escherichia coli* MG1655 and *Salmonella enterica* LT2 (*E. coli* *S. enterica* dN) or the average substitution rate of the proteins in the 74 proteobacteria tree (average dN)**

| Expressivity  | <i>n</i> | <i>E. coli</i> / <i>S. enterica</i> dN |                | Average dN      |                |
|---------------|----------|----------------------------------------|----------------|-----------------|----------------|
|               |          | Spearman $\rho$                        | <i>P</i> value | Spearman $\rho$ | <i>P</i> value |
| mRNA index    | 61       | $\rho = -0.68$                         | $< 10^{-4}$    | $\rho = -0.32$  | 0.01           |
| CAI           | 61       | $\rho = -0.39$                         | 0.003          | $\rho = -0.45$  | 0.0003         |
| Protein index | 60*      | $\rho = -0.52$                         | $< 10^{-4}$    | $\rho = -0.41$  | 0.001          |

See *SI Materials and Methods* for a definition of the expressivity indices.  
\*Protein concentration unknown for one protein.

**Table S2. Proteins IDs and function included in the ribosome and replisome concatenates and in the concatenates of HEP and LEP of the HOGENOM4 reference set**

| Concatenate                      | Protein name/ID         | Function                                          |                                     |
|----------------------------------|-------------------------|---------------------------------------------------|-------------------------------------|
| <b>Proteobacterial orthologs</b> |                         |                                                   |                                     |
| Ribosome (2,446 sites)           | rplA                    | 50S Ribosomal subunit protein L1                  |                                     |
|                                  | rplB                    | 50S Ribosomal subunit protein L2                  |                                     |
|                                  | rplC                    | 50S Ribosomal subunit protein L3                  |                                     |
|                                  | rplD                    | 50S Ribosomal subunit protein L4                  |                                     |
|                                  | rplF                    | 50S Ribosomal subunit protein L6                  |                                     |
|                                  | rplJ                    | 50S Ribosomal subunit protein L10                 |                                     |
|                                  | rplK                    | 50S Ribosomal subunit protein L11                 |                                     |
|                                  | rplL                    | 50S Ribosomal subunit protein L7/L12              |                                     |
|                                  | rplM                    | 50S Ribosomal subunit protein L13                 |                                     |
|                                  | rplO                    | 50S Ribosomal subunit protein L15                 |                                     |
|                                  | rplP                    | 50S Ribosomal subunit protein L16                 |                                     |
|                                  | rplR                    | 50S Ribosomal subunit protein L18                 |                                     |
|                                  | rpsA                    | 30S Ribosomal subunit protein S1                  |                                     |
|                                  | rpsC                    | 30S Ribosomal subunit protein S3                  |                                     |
|                                  | rpsD                    | 30S Ribosomal subunit protein S4                  |                                     |
|                                  | rpsG                    | 30S Ribosomal subunit protein S7                  |                                     |
|                                  | rpsM                    | 30S Ribosomal subunit protein S13                 |                                     |
|                                  | Replisome (2,199 sites) | dnaB                                              | Replicative DNA helicase            |
|                                  |                         | dnaE                                              | DNA polymerase III $\alpha$ subunit |
|                                  |                         | dnaN                                              | DNA polymerase III, $\beta$ subunit |
| gyrA                             |                         | DNA gyrase type II topoisomerase subunit A        |                                     |
| gyrB                             |                         | DNA gyrase type II topoisomerase subunit B        |                                     |
| <b>HOGENOM4 homolog families</b> |                         |                                                   |                                     |
| HEP (8,131 sites)                | HBG000348               | 50S Ribosomal protein L19                         |                                     |
|                                  | HBG001285               | DNA directed RNA polymerase $\beta$ chain         |                                     |
|                                  | HBG001445               | DNA directed RNA polymerase $\alpha$ chain        |                                     |
|                                  | HBG003915               | Phosphoglycerate kinase triosephosphate isomerase |                                     |
|                                  | HBG011746               | Elongation factor TS                              |                                     |
|                                  | HBG023340               | 50S Ribosomal protein L11 2 L11 3                 |                                     |
|                                  | HBG046904               | 30S Ribosomal protein S12                         |                                     |
|                                  | HBG055795               | 50S Ribosomal protein L4                          |                                     |
|                                  | HBG072316               | 50S Ribosomal protein L18                         |                                     |
|                                  | HBG079273               | 50S Ribosomal protein L5                          |                                     |
|                                  | HBG083688               | Trigger factor 2                                  |                                     |
|                                  | HBG110521               | 50S Ribosomal protein L20                         |                                     |
|                                  | HBG114333               | 30S Ribosomal protein S16                         |                                     |
|                                  | HBG119370               | 30S Ribosomal protein S11                         |                                     |
|                                  | HBG142539               | Translation initiation factor IF 3                |                                     |
|                                  | HBG154396               | 50S Ribosomal protein L3                          |                                     |
|                                  | HBG155458               | 50S Ribosomal protein L2 RPLB                     |                                     |
|                                  | HBG174293               | Nucleoside diphosphate kinase b                   |                                     |
|                                  | HBG180703               | 50S Ribosomal protein L27                         |                                     |
|                                  | HBG187258               | 16S rRNA processing protein rimM                  |                                     |
|                                  | HBG187568               | 50S Ribosomal protein L28 2                       |                                     |
|                                  | HBG192816               | 30S Ribosomal protein S8                          |                                     |
|                                  | HBG211133               | 50S Ribosomal protein L13                         |                                     |
|                                  | HBG232228               | 50S Ribosomal protein L22                         |                                     |
|                                  | HBG232265               | 30S Ribosomal protein S17 2                       |                                     |
|                                  | HBG236852               | 30S Ribosomal protein S10                         |                                     |
|                                  | HBG249765               | 50S Ribosomal protein L21                         |                                     |
|                                  | HBG297151               | 50S Ribosomal protein L6                          |                                     |
|                                  | HBG301585               | Phenylalanyl trna synthetase $\beta$ chain        |                                     |
|                                  | HBG301748               | nusA antitermination factor                       |                                     |
|                                  | HBG313666               | 30S Ribosomal protein S6                          |                                     |
|                                  | HBG313694               | 50S Ribosomal protein L7 L12                      |                                     |
|                                  | HBG323189               | 50S Ribosomal protein L24                         |                                     |
|                                  | HBG331018               | 50S Ribosomal protein L17                         |                                     |
|                                  | HBG338914               | 30S Ribosomal protein S18 2                       |                                     |
|                                  | HBG341023               | 50S Ribosomal protein L16                         |                                     |
|                                  | HBG345344               | 50S Ribosomal protein L9                          |                                     |
|                                  | HBG347903               | Alanyl tRNA synthetase protein                    |                                     |

Table S2. Cont.

| Concatenate       | Protein name/ID | Function                                          |
|-------------------|-----------------|---------------------------------------------------|
|                   | HBG353111       | 30S Ribosomal protein S9                          |
|                   | HBG369991       | 50S Ribosomal protein L10                         |
|                   | HBG378671       | 30S Ribosomal protein S7 2                        |
|                   | HBG380059       | 50S Ribosomal protein L15                         |
|                   | HBG381711       | 30S Ribosomal protein S13                         |
|                   | HBG382195       | 30S Ribosomal protein S19                         |
|                   | HBG384371       | 50S Ribosomal protein L14                         |
|                   | HBG386975       | 30S Ribosomal protein S5                          |
|                   | HBG396698       | 30S Ribosomal protein S3                          |
|                   | HBG399262       | tRNA guanine methyltransferase                    |
|                   | HBG415562       | 30S Ribosomal protein S20                         |
|                   | HBG433393       | 50S Ribosomal protein L32 3                       |
|                   | HBG448673       | Preprotein translocase secY                       |
|                   | HBG468280       | 50S Ribosomal protein L35                         |
|                   | HBG481547       | 30S Ribosomal protein S2                          |
|                   | HBG507162       | Hypothetical protein ybaB                         |
|                   | HBG515224       | 50S Ribosomal protein L34                         |
|                   | HBG529802       | 50S Ribosomal protein L1                          |
|                   | HBG532383       | 50S Ribosomal protein L23                         |
| LEP (4,469 sites) | HBG000055       | Regulation factor membrane-associated             |
|                   | HBG000124       | Predicted regulation factor                       |
|                   | HBG001073       | Pantetheine-phosphate adenyltransferase           |
|                   | HBG001081       | Predicted rRNA methylase                          |
|                   | HBG001135       | Hemolysin protein                                 |
|                   | HBG001183       | Holliday junction ATP dependent DNA helicase ruvB |
|                   | HBG001394       | Glucose inhibited cell-division protein           |
|                   | HBG060350       | Heat inducible transcription repressor            |
|                   | HBG230304       | Hypothetical protein yqeL                         |
|                   | HBG123577       | Putative methyltransferase SAM dependent          |
|                   | HBG144394       | Regulation factor cell partioning and DNA repair  |
|                   | HBG184931       | Primosomal protein N' superfamily II helicase     |
|                   | HBG185190       | Protein yggJ                                      |
|                   | HBG187703       | Protein ygcC aminodeoxychorismate lyase           |
|                   | HBG194406       | Holliday junction resolvase                       |
|                   | HBG236550       | Predicted o sialoglycoprotein endopeptidase       |
|                   | HBG302091       | Hypothetical protein yjeE                         |
|                   | HBG328898       | ATP dependent DNA helicase recG                   |
|                   | HBG377949       | DNA mismatch repair protein mutS                  |
|                   | HBG410043       | Segregation and condensation protein A            |
|                   | HBG457716       | DNA repair protein recN                           |
|                   | HBG505437       | Chromosome segregation protein smc                |



**Table S3. Clades branching closest to the archaeal outgroup in deep-phylogenetic reconstruction based on HEP and LEP markers**

| Clade                       | Ancestral log(g)* | Average log(g) | Closest <sup>†</sup> Among closest <sup>‡</sup> |             | Closest <sup>†</sup> Among closest <sup>‡</sup> |             |
|-----------------------------|-------------------|----------------|-------------------------------------------------|-------------|-------------------------------------------------|-------------|
|                             |                   |                | HEP trees                                       |             | LEP trees                                       |             |
| <b>Cl:</b> clostridia       | -0.33             | -0.41          | 0                                               | 7.4         | <b>13.8</b>                                     | <b>42.6</b> |
| <b>Ba:</b> bacillales       | -0.08             | -0.11          | 0                                               | 1.8         | 0.2                                             | 0.2         |
| <b>εP:</b> ε-proteobacteria | 0.31              | 0.29           | 4.2                                             | 5.8         | 0                                               | 0           |
| <b>Te:</b> tenericutes      | 0.33              | 0.51           | 7.2                                             | 9           | <b>11.6</b>                                     | <b>12.8</b> |
| <b>βP:</b> β-proteobacteria | 0.35              | 0.38           | 0                                               | 2.6         | 0                                               | 8.6         |
| <b>γP:</b> γ-proteobacteria | 0.37              | 0.14           | 0.2                                             | 2.8         | 0                                               | 8.6         |
| <b>Ac:</b> actinobacteria   | 0.49              | 0.84           | 0.2                                             | 9.6         | <b>29.6</b>                                     | <b>30</b>   |
| <b>αP:</b> α-proteobacteria | 0.68              | 0.68           | 0                                               | 3           | 3.4                                             | <b>14.8</b> |
| <b>Bt:</b> bacteroidetes    | 0.8               | 0.43           | 0.6                                             | 4.8         | 0                                               | 0           |
| <b>δP:</b> δ-proteobacteria | 0.82              | 1.01           | 0                                               | 3.4         | 0                                               | 2.4         |
| <b>Sp:</b> spirochaetes     | 0.87              | 0.88           | <b>24.2</b>                                     | <b>29</b>   | 0                                               | 0           |
| <b>Cy:</b> cyanobacteria    | 1.17              | 1.13           | <b>16.8</b>                                     | <b>22.8</b> | 0                                               | 0.4         |
| <b>Ch:</b> chlamydiae       | 1.33              | 1.43           | <b>28.4</b>                                     | <b>31.4</b> | 0                                               | 0           |

See Fig. S1B for the distribution of minimal generation times (g).

\*Clades ordered according to inferred ancestral minimum generation time using GLS with the Brownian motion model (R package *ape*).

<sup>†</sup>Trees (%) where the clade's ancestor is the node closest to the archaeal outgroup. Boldface numbers: Trees (%) > 10.

<sup>‡</sup>Trees (%) where the clade's ancestor is part of several ancestor nodes equidistant to the root. Boldface numbers: Trees (%) > 10.
